# Supplementary material for: Prostate Region-Wise Imaging Biomarker Profiles for Risk Stratification and Biochemical Recurrence Prediction
Source: MDPI journal article supplement (doi:10.3390/cancers15164163), 2023-08-18
Supplement: s1 [file s1]

## Supplementary Tables

**Table S1.** Patient distribution according to the available MRI sequences and their stratification risk.

| Analysis  | Sample size | Low/favorable-IR | High/unfavorable-IR |
|-----------|-------------|------------------|---------------------|
| Texture   | 128         | 32               | 96                  |
| Diffusion | 107         | 31               | 76                  |
| Perfusion | 62          | 24               | 38                  |

IR = intermediate risk.

**Table S2.** Patient distribution according to the available MRI sequences and the presence or absence of biochemical recurrence 10 years from diagnosis.

| Analysis  | Sample size | No BCR | BCR |
|-----------|-------------|--------|-----|
| Texture   | 128         | 108    | 20  |
| Diffusion | 107         | 92     | 15  |
| Perfusion | 62          | 54     | 8   |

BCR = biochemical recurrence.

**Table S3.** Patient distribution according to the available MRI sequences and the presence or absence of biochemical recurrence 10 years from diagnosis in high/unfavorable-intermediate risk patients.

| Analysis  | Sample size | No BCR | BCR |
|-----------|-------------|--------|-----|
| Texture   | 96          | 78     | 18  |
| Diffusion | 76          | 63     | 13  |
| Perfusion | 38          | 32     | 6   |

BCR = biochemical recurrence.
